# Supplementary material
Source: publisher figshare collection journal article supplement (https://sage.figshare.com/ndownloader/files/20105645)
Supplement: Supplementary file 1 [file 20105645]

## INTERVIEW GUIDE

1. In your opinion, what is or could be the role of the occupational therapist in family medicine groups?
2. Is the role of the occupational therapist compatible with your role as a physician in a family medicine group?
3. For which clients, seen in primary care, do you think occupational therapy services could be required and beneficial?
4. What are the main health problems for which an occupational therapy referral could be considered?
5. What unmet needs of these clients/patients could correspond to the role of the occupational therapist?
6. What skills and competencies of the occupational therapist could be solicited in the context of family medicine groups?
7. What are the reasons/needs that would lead you to make a reference in occupational therapy?
8. In your opinion, what are the obstacles and facilitators to the integration of occupational therapists into family medicine groups?
  - Do you think that your family medicine group has the physical (premises, equipment) and financial resources to support the integration of an occupational therapist into the team?

- To what extent do you think social influences facilitate or hinder the integration of occupational therapists into family medicine groups?
  - Are practice routines and habits an obstacle/facilitator to the integration of occupational therapists into family medicine groups?
9. According to the obstacles and facilitators identified, are you confident that physicians responsible for family medicine groups are able to integrate occupational therapists into these teams at this time? Why?
10. According to you, what would be the impact (positive or negative) of the integration of occupational therapists in family medicine groups teams?
- Do you believe that the integration of occupational therapists in family medicine groups would improve patients care?
  - Would improve patients' health?
11. Finally, do you have any other comments to add on the integration of occupational therapists into FMG?
